# Supplementary material
Source: Springer Nature journal article supplement (https://www.springermedizin.de/resource/supplementary/12933_2014_792_MOESM1_ESM.pdf/9539232)

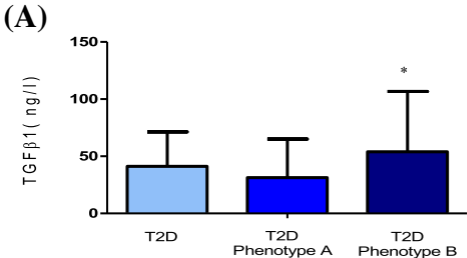

\* P < 0.05 vs phenotype A patients

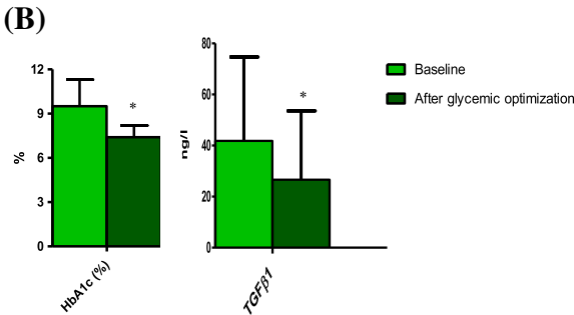

\* P < 0.05 vs baseline

Supplement: MOESM1 [file 9539232]
